# Supplementary material for: A Variable Temperature X-ray Diffraction Investigation of [PPN+][S4N5−]: Supramolecular Interactions Governing an Order/Disorder Transformation and the First High Resolution X-ray Structure of the Anion
Source: MDPI journal article supplement (doi:10.3390/molecules19021956), 2014-02-12
Supplement: s1 [file s1]

## Supporting Information

Source table of data for the graph in Figure 5

Table S1

Lists of coordinates from DFT optimizations

Table S2,3

**Table S1.** Data for the analysis of unit cell and cavity “host” volumes.

| Temp       | Unit Cell Vol | Anion vol | Anion Vol % | Cavity Vol | Cavity Vol % | Solv Vol | Solv Vol % |
|------------|---------------|-----------|-------------|------------|--------------|----------|------------|
| 100        | 3635.8        | 556.76    | 15.3%       | 829.32     | 22.8%        | 272.56   | 7.5%       |
| 120        | 3643.73       | 562.52    | 15.4%       | 839.56     | 23.0%        | 277.04   | 7.6%       |
| 140        | 3666.47       | 567.85    | 15.5%       | 864.99     | 23.6%        | 297.14   | 8.1%       |
| 173        | 3689.03       | 592.88    | 16.1%       | 885.52     | 24.0%        | 292.64   | 7.9%       |
| 200        | 3714.03       | 602.28    | 16.2%       | 913.2      | 24.6%        | 310.92   | 8.4%       |
| 240        | 3744.39       | 639.71    | 17.1%       | 971.46     | 25.9%        | 331.75   | 8.9%       |
| 280        | 3805.51       | 665.18    | 17.5%       | 1012.8     | 26.6%        | 347.62   | 9.1%       |
| Total incr | 169.71        | 108.42    | 2.17%       | 183.48     | 3.80%        | 75.06    | 1.64%      |

**Table S2.** List of coordinates from DFT optimizations of  $[\text{S}_4\text{N}_5]^-$  in B3LYP/6-311++G(3df) – with symmetry restriction to  $\text{C}_{2v}$ .

Total energy = -1866.63938873 Hartree. Stoichiometry  $\text{N}_5\text{S}_4(1-)$

Framework group  $\text{C}_{2v}[\text{C}_2(\text{N}), \text{SGV}(\text{S}_2), \text{SGV}'(\text{S}_2), \text{X}(\text{N}_4)]$

Deg. of freedom 7

Full point group  $\text{C}_{2v}$

Largest Abelian subgroup  $\text{C}_{2v}$  NOp 4

Largest concise Abelian subgroup  $\text{C}_{2v}$  NOp 4

| Coordinates (Angstroms) |               |             |          |          |          |  |
|-------------------------|---------------|-------------|----------|----------|----------|--|
| Center Number           | Atomic Number | Atomic Type | X        | Y        | Z        |  |
| 2                       | 16            | 0           | -1.42135 | 0        | -1.0644  |  |
| 3                       | 16            | 0           | 0        | -1.39569 | 0.856442 |  |
| 4                       | 16            | 0           | 1.421352 | 0        | -1.0644  |  |
| 5                       | 7             | 0           | -1.29304 | -1.35735 | -0.19578 |  |
| 6                       | 7             | 0           | 1.293039 | -1.35735 | -0.19578 |  |
| 7                       | 7             | 0           | 1.293039 | 1.357345 | -0.19578 |  |
| 8                       | 7             | 0           | -1.29304 | 1.357345 | -0.19578 |  |
| 9                       | 7             | 0           | 0        | 0        | 1.733792 |  |

**Table S3.** List of coordinates from DFT optimizations of  $[S_4N_5]^-$  in B3LYP/6-311++G(3df) – without symmetry restriction.

Total energy = −1866.63939127 Hartree. Stoichiometry N5S4(1-)

Framework group C2V[C2(N),SGV(S2),SGV'(S2),X(N4)]

Deg. of freedom 21

Full point group C1

Largest Abelian subgroup C1 NOp 1

Largest concise Abelian subgroup C1 NOp 1

| Coordinates (Angstroms) |               |             |          |           |           |
|-------------------------|---------------|-------------|----------|-----------|-----------|
| Center Number           | Atomic Number | Atomic Type | X        | Y         | Z         |
| 1                       | 16            | 0           | 1.394859 | −0.047679 | 0.856588  |
| 2                       | 16            | 0           | 0.049941 | 1.420022  | −1.064534 |
| 3                       | 16            | 0           | −1.39483 | 0.047656  | 0.856623  |
| 4                       | 16            | 0           | −0.04994 | −1.419998 | −1.064585 |
| 5                       | 7             | 0           | −1.31122 | 1.339442  | −0.196525 |
| 6                       | 7             | 0           | −1.40222 | −1.245278 | −0.195186 |
| 7                       | 7             | 0           | 1.311208 | −1.33945  | −0.196478 |
| 8                       | 7             | 0           | 1.402222 | 1.245317  | −0.195028 |
